# Supplementary material
Source: ML conference proceedings conference paper supplement (https://proceedings.neurips.cc/paper_files/paper/2018/hash/65fc52ed8f88c81323a418ca94cec2ed-Abstract.html)
Supplement: Supplementary file [file 65fc52ed8f88c81323a418ca94cec2ed-Supplemental.zip]

---

# Supplementary Material for “Faster Online Learning of Optimal Threshold for Consistent F-measure Optimization”

---

Mingrui Liu<sup>\*†</sup>, Xiaoxuan Zhang<sup>\*†</sup>, Xun Zhou<sup>‡</sup>, Tianbao Yang<sup>†</sup>

<sup>†</sup>Department of Computer Science, The University of Iowa, Iowa City, IA 52242, USA

<sup>‡</sup>Department of Management Sciences, The University of Iowa, Iowa City, IA 52242, USA  
mingrui-liu, xiaoxuan-zhang, xun-zhou, tianbao-yang@uiowa.edu

## 1 Extension to Other Metrics

In this section, we consider the extension of the proposed method to other metrics, in particular Jaccard similarity coefficient, and  $F_\beta$  measure.

Let us first consider Jaccard similarity coefficient (JAC) [2]:

$$\text{JAC}(f) = \frac{\int_{\mathcal{X}} \eta(\mathbf{x}) f(\mathbf{x}) d\mu(\mathbf{x})}{\pi + \int_{\mathcal{X}} f(\mathbf{x}) d\mu(\mathbf{x}) - \int_{\mathcal{X}} \eta(\mathbf{x}) f(\mathbf{x}) d\mu(\mathbf{x})}.$$

Then we have

$$\frac{1}{\text{JAC}(f)} = \frac{\pi + \int_{\mathcal{X}} f(\mathbf{x}) d\mu(\mathbf{x})}{\int_{\mathcal{X}} \eta(\mathbf{x}) f(\mathbf{x}) d\mu(\mathbf{x})} - 1 = \frac{2}{F(f)} - 1.$$

Therefore

$$\text{JAC}(f) = \frac{F(f)}{2 - F(f)}.$$

If  $F(f)$  is maximized so is  $\text{JAC}(f)$ . According to [2], the optimal threshold  $\theta_{\text{JAC},*}$  for maximizing  $\text{JAC}(\eta_\theta(\mathbf{x}))$  is given by  $\theta_{\text{JAC},*} = \frac{\text{JAC}_*}{1 + \text{JAC}_*} = F_*/2 = \theta_{F,*}$ , where  $\theta_{F,*}$  is the optimal threshold for F-measure maximization. Given an estimate of  $\theta_F$  for F-measure optimization, we can set the threshold for JAC maximization as  $\theta_{\text{JAC}} = \theta_F$ , and when  $\theta_F \rightarrow \theta_{F,*}$ , we have  $\theta_{\text{JAC}} \rightarrow \theta_{\text{JAC},*}$ . As a result, the proposed algorithm FOFO is still applicable.

Next, let us consider  $F_\beta$ -measure:

$$F_\beta(f) = \frac{(1 + \beta^2) \int_{\mathcal{X}} \eta(\mathbf{x}) f(\mathbf{x}) d\mu(\mathbf{x})}{\beta^2 \pi + \int_{\mathcal{X}} f(\mathbf{x}) d\mu(\mathbf{x})}.$$

Following the same analysis as in [3][Lemma 13, Lemma 14], we can have that  $F_\beta(\eta_\theta)$  is maximized at a point  $\theta_{\beta,*}$  that is the root of the following equation:

$$\pi \beta^2 \theta - \mathbb{E}_{\mathbf{x}} [(\eta(\mathbf{x}) - \theta)_+] = 0,$$

which is the optimal solution of the following strongly convex function

$$Q(\theta) \triangleq \frac{1}{2} \mathbb{E}_{\mathbf{x}} [(\eta(\mathbf{x}) - \theta)_+]^2 + \frac{1}{2} \pi \beta^2 \theta^2.$$

---

<sup>\*</sup>equal contribution

For the optimal threshold  $\theta_{\beta,*}$  and optimal  $F_{\beta,*}$ , we have  $\theta_{\beta,*} = \frac{F_{\beta,*}}{1+\beta^2}$ . Hence, we can search for  $\theta_{\beta,*}$  by solving the following problem:

$$\min_{\theta \in [0, 1/(1+\beta^2)]} Q(\theta) \triangleq \frac{1}{2} \mathbb{E}_{\mathbf{x}} [(\eta(\mathbf{x}) - \theta)_+^2] + \frac{1}{2} \pi \beta \theta^2.$$

We can modify FOFO a little to account for this change.

## 2 Missing Proofs

### 2.1 $\mathbf{w}_*$ minimizes the expected logistic loss

Under the assumption that

$$\eta(\mathbf{x}) = \Pr(y = 1 | \mathbf{x}, \mathbf{w}_*) = \frac{1}{1 + \exp(-\mathbf{w}_*^\top \phi(\mathbf{x}))},$$

we prove that  $\mathbf{w}_*$  is the minimizer of the following problem:

$$\min_{\mathbf{w} \in \mathbb{R}^d} L(\mathbf{w}) \triangleq \mathbb{E}_{\mathbf{x}, y} \log(1 + \exp(-(2y - 1)\mathbf{w}^\top \phi(\mathbf{x}))). \quad (7)$$

Using variable change  $\tilde{y} = 2y - 1$ ,  $\Pr(\tilde{y} | \mathbf{x}, \mathbf{w}_*) = \frac{1}{1 + \exp(-\tilde{y}\mathbf{w}_*^\top \phi(\mathbf{x}))}$ , and  $L(\mathbf{w}) = \mathbb{E}_{\mathbf{x}, \tilde{y}} \log(1 + \exp(-\tilde{y}\mathbf{w}^\top \phi(\mathbf{x})))$ . Then,

$$\begin{aligned} L(\mathbf{w}) &= \mathbb{E}_{\mathbf{x}, \tilde{y}} \log(1 + \exp(-\tilde{y}\mathbf{w}^\top \phi(\mathbf{x}))) = - \int_{\mathbf{x}} \mathbb{E}_{\tilde{y} | \mathbf{x}} [\log \Pr(\tilde{y} | \mathbf{x}, \mathbf{w})] d\mu(\mathbf{x}) \\ &= \int_{\mathbf{x}} \left[ - \sum_{\tilde{y}} \Pr(\tilde{y} | \mathbf{x}, \mathbf{w}_*) \log \Pr(\tilde{y} | \mathbf{x}, \mathbf{w}) \right] d\mu(\mathbf{x}) \end{aligned}$$

Note that the term in the square brackets is the KL divergence between two distributions  $\Pr(\tilde{y} | \mathbf{x}, \mathbf{w}_*)$  and  $\Pr(\tilde{y} | \mathbf{x}, \mathbf{w})$  plus a constant independent of  $\mathbf{w}$ . Therefore  $\mathbf{w} = \mathbf{w}_*$  minimizes this term and hence minimizes  $L(\mathbf{w})$ .

### 2.2 Proof of Lemma 1

We prove the strong convexity parameter here.

$$\begin{aligned} Q(\theta) &= \frac{1}{2} \int_{\eta(\mathbf{x}) \geq \theta} (\theta^2 - 2\eta(\mathbf{x})\theta + \eta(\mathbf{x})^2) d\mu(\mathbf{x}) + \frac{1}{2} \pi \theta^2 \\ &= \frac{1}{2} \theta^2 (\rho_\theta + \pi) - \theta \int_{\eta(\mathbf{x}) \geq \theta} \eta(\mathbf{x}) d\mu(\mathbf{x}) + c \end{aligned}$$

where  $\rho_\theta = \int_{\eta(\mathbf{x}) \geq \theta} d\mu(\mathbf{x})$ ,  $c$  is a constant independent of  $\theta$ . Then we can see the strong convexity parameter of  $Q(\theta)$  over  $[0, 0.5]$  is  $\pi + \min_{\theta \in [0, 0.5]} \rho_\theta$ .

### 2.3 Proof of Lemma 2

*Proof.* For  $A \subseteq \mathcal{X}$ , define  $\rho(A) = \int_{\mathbf{x} \in A} 1 \cdot d\mu(\mathbf{x}) = \Pr(\mathbf{x} \in A)$ . Let  $\mathcal{X}_* = \{\mathbf{x} \in \mathcal{X} | \eta(\mathbf{x}) \geq \theta_*\}$  and  $\mathcal{X}' = \{\mathbf{x} \in \mathcal{X} | \eta(\mathbf{x}) \geq \theta\}$ , and note that  $\eta_\theta(\mathbf{x}) = \mathbb{I}(\eta(\mathbf{x}) \geq \theta)$ , we have

$$\frac{1}{2} F(\eta_\theta) = \frac{\int_{\mathcal{X}'} \eta(\mathbf{x}) d\mu(\mathbf{x})}{\pi + \rho(\mathcal{X}')} \quad (8)$$

According to [3],  $F(\eta_{\theta_*}) = 2\theta_*$ . Thus,

$$\begin{aligned} \theta_* &= \frac{1}{2} F(\eta_{\theta_*}) = \frac{\int_{\mathcal{X}_*} \eta(\mathbf{x}) d\mu(\mathbf{x})}{\pi + \rho(\mathcal{X}_*)} \\ \int_{\mathcal{X}_*} \eta(\mathbf{x}) d\mu(\mathbf{x}) &= \theta_* (\pi + \rho(\mathcal{X}_*)) \end{aligned} \quad (9)$$

Then we consider two cases based on the relation between  $\theta$  and  $\theta_*$ .

**Case 1.**  $0 \leq \theta \leq \theta_*$

Since  $\mathcal{X}_* \subseteq \mathcal{X}'$ , let  $A = \mathcal{X}' - \mathcal{X}_* = \{\mathbf{x} \in \mathcal{X} | \theta \leq \eta(\mathbf{x}) < \theta_*\}$ . From (8),

$$\frac{1}{2}F(\eta_\theta) = \frac{\int_{\mathcal{X}_*} \eta(\mathbf{x})d\mu(\mathbf{x}) + \int_A \eta(\mathbf{x})d\mu(\mathbf{x})}{\pi + \rho(\mathcal{X}_*) + \rho(A)}$$

On  $A$ , we have  $\eta(\mathbf{x}) \geq \theta$ , thus  $\int_A \eta(\mathbf{x})d\mu(\mathbf{x}) \geq \theta\rho(A)$ . From (9), we have

$$\begin{aligned} \frac{1}{2}F(\eta_\theta) &\geq \frac{\theta_*(\pi + \rho(\mathcal{X}_*)) + \theta\rho(A)}{\pi + \rho(\mathcal{X}_*) + \rho(A)} = \frac{\theta_*(\pi + \rho(\mathcal{X}_*)) + \theta_*\rho(A) - \theta_*\rho(A) + \theta\rho(A)}{\pi + \rho(\mathcal{X}_*) + \rho(A)} \\ &= \theta_* - \frac{(\theta_* - \theta)\rho(A)}{\pi + \rho(\mathcal{X}_*) + \rho(A)} \geq \theta_* - (\theta_* - \theta) = \theta \end{aligned}$$

Thus  $F(\eta_{\theta_*}) - F(\eta_\theta) \leq 2(\theta_* - \theta) \leq \frac{2}{\pi}|\theta_* - \theta|$ .

**Case 2.**  $\theta_* < \theta \leq 0.5$

Since  $\mathcal{X}' \subseteq \mathcal{X}_*$ , let  $A = \mathcal{X}_* - \mathcal{X}' = \{\mathbf{x} \in \mathcal{X} | \theta_* \leq \eta(\mathbf{x}) < \theta\}$ . From (8),

$$\frac{1}{2}F(\eta_\theta) = \frac{\int_{\mathcal{X}_*} \eta(\mathbf{x})d\mu(\mathbf{x}) - \int_A \eta(\mathbf{x})d\mu(\mathbf{x})}{\pi + \rho(\mathcal{X}_*) - \rho(A)}$$

On  $A$ , we have  $\eta(\mathbf{x}) < \theta$ , thus  $\int_A \eta(\mathbf{x})d\mu(\mathbf{x}) \leq \theta\rho(A)$ . From (9), we have

$$\begin{aligned} \frac{1}{2}F(\eta_\theta) &\geq \frac{\theta_*(\pi + \rho(\mathcal{X}_*)) - \theta\rho(A)}{\pi + \rho(\mathcal{X}_*) - \rho(A)} = \frac{\theta_*(\pi + \rho(\mathcal{X}_*)) - \theta_*\rho(A) + \theta_*\rho(A) - \theta\rho(A)}{\pi + \rho(\mathcal{X}_*) - \rho(A)} \\ &= \theta_* - \frac{(\theta - \theta_*)\rho(A)}{\pi + \rho(\mathcal{X}_*) - \rho(A)} \geq \theta_* - \frac{1}{\pi}(\theta - \theta_*). \end{aligned}$$

The last step holds because  $\rho(A) < 1$  and  $\rho(\mathcal{X}_*) - \rho(A) = \rho(\mathcal{X}') \geq 0$ . Then we have  $F(\eta_{\theta_*}) - F(\eta_\theta) \leq 2(\theta_* - \theta_* + \frac{1}{\pi}(\theta - \theta_*)) = \frac{2}{\pi}(\theta - \theta_*) = \frac{2}{\pi}|\theta_* - \theta|$ .

We combine both cases and get the final result.  $\square$

## 2.4 Proof of Theorem 2

*Proof.* Here we consider any stage  $k$ . Let  $\tau$  denote the iteration index of SFO and  $t = T_0 + \tau$  denote the global index. Define  $g(\theta) = q(\theta) = \partial Q(\theta)$ ,  $\mathbf{z} = (\mathbf{x}, y)$ ,  $G(\theta, \mathbf{z}) = \pi\theta - (\eta(\mathbf{x}) - \theta)_+$ ,  $\hat{G}_t(\theta, \mathbf{z}) = \hat{\pi}_t\theta - (\hat{\eta}_t(\mathbf{x}) - \theta)_+$ . It is clear that  $\mathbb{E}[G(\theta, \mathbf{z})] = g(\theta)$ , and  $\max(|g(\theta_\tau)|, |G(\theta_\tau, \mathbf{z}_t)|, |\hat{G}_t(\theta_\tau, \mathbf{z}_t)|) \leq 2$  for any  $\tau$ . Following standard analysis of gradient descent, we have

$$\frac{1}{T} \sum_{\tau=1}^T (\theta_\tau - \theta_*) \hat{G}_t(\theta_\tau, \mathbf{z}_t) \leq \frac{|\theta_1 - \theta_*|^2}{2\gamma T} + \frac{\gamma \max(\hat{G}_t(\theta_\tau, \mathbf{z}_t))^2}{2}$$

Then by the convexity of  $Q(\theta)$ , we have

$$\begin{aligned} Q(\bar{\theta}_T) - Q(\theta_*) &\leq \frac{\|\theta_1 - \theta_*\|_2^2}{2\gamma T} + \frac{4\gamma}{2} + \frac{\sum_{\tau=1}^T (\theta_\tau - \theta_*)(g(\theta_\tau) - G(\theta_\tau, \mathbf{z}_t))}{T} \\ &\quad + \frac{\sum_{\tau=1}^T (\theta_\tau - \theta_*)(G(\theta_\tau, \mathbf{z}_t) - \hat{G}_t(\theta_\tau, \mathbf{z}_t))}{T} \\ &= \text{I} + \text{II} + \text{III} + \text{IV} \end{aligned}$$

Now we try to bound the four terms respectively. Note that  $\text{I} \leq \frac{R^2}{2\gamma T}$ ,  $\text{II} \leq 2\gamma$ . To bound the third term, we utilize the similar analysis of SGD (e.g. [4]). Define

$$\begin{aligned} \tilde{\theta}_1 &= \theta_1 \in [0, 0.5] \cap \mathcal{B}(\theta_1, R), \\ \tilde{\theta}_{\tau+1} &= \Pi_{[0, 0.5] \cap \mathcal{B}(\theta_1, R)}(\tilde{\theta}_\tau - \gamma(g(\theta_\tau) - G(\theta_\tau, \mathbf{z}_t))). \end{aligned}$$

Then we have

$$\begin{aligned} \sum_{\tau=1}^T \gamma(\tilde{\theta}_\tau - \theta_*)(g(\theta_\tau) - G(\theta_\tau, \mathbf{z}_t)) &\leq \frac{\|\tilde{\theta}_1 - \theta_*\|_2^2}{2} + \frac{1}{2} \sum_{\tau=1}^T \gamma^2 \|g(\theta_\tau) - G(\theta_\tau, \mathbf{z}_t)\|_2^2 \\ &\leq \frac{R^2}{2} + 8\gamma^2 T. \end{aligned} \quad (10)$$

Note that both  $\theta_\tau$  and  $\tilde{\theta}_\tau$  are measurable with respect to  $\mathcal{F}_{t-1} = \{\mathbf{z}_1, \dots, \mathbf{z}_{t-1}\}$ , and  $\{S_\tau : \gamma(\theta_\tau - \tilde{\theta}_\tau)(g(\theta_\tau) - G(\theta_\tau, \mathbf{z}_t)), \tau = 1, \dots, T\}$  is a martingale difference sequence, and for any  $\tau$  we have  $|\gamma(\theta_\tau - \tilde{\theta}_\tau)(g(\theta_\tau) - G(\theta_\tau, \mathbf{z}_t))| \leq 4\gamma\|\theta_\tau - \tilde{\theta}_\tau\|_2 \leq 4\gamma \times 2R = 8\gamma R$ . Then by Azuma-Hoeffding's inequality, we have with probability at least  $1 - \frac{\delta}{3}$ ,

$$\sum_{\tau=1}^T \gamma(\theta_\tau - \tilde{\theta}_\tau)(g(\theta_\tau) - G(\theta_\tau, \mathbf{z}_t)) \leq 8\gamma R \sqrt{2T \ln(\frac{3}{\delta})}. \quad (11)$$

Adding (10) and (11) together suffices to show that with probability at least  $1 - \frac{\delta}{3}$ , we have

$$\text{III} \leq \frac{R^2}{2\gamma T} + 8\gamma + \frac{8R\sqrt{2\ln(\frac{3}{\delta})}}{\sqrt{T}}.$$

Next we bound **IV** according to the Lemma 3 introduced later. By union bound, we have with probability at least  $1 - \frac{\delta}{3}$ , we have

$$\begin{aligned} \text{IV} &\leq \frac{1}{T} \sum_{\tau=1}^T \left( \sup_{\tau} (\|\theta_\tau - \theta_1\|_2 + \|\theta_1 - \theta_*\|_2) \cdot \sup_{\theta \in [0, 0.5], \mathbf{z} \in \mathcal{Z}} \|\hat{G}_t(\theta, \mathbf{z}) - G(\theta, \mathbf{z})\|_2 \right) \\ &\leq \frac{2R \cdot (1 + C\kappa) \times \sum_{t=1}^T \sqrt{\frac{\ln(12T/\delta)}{t}}}{T} \leq \frac{4R(1 + C\kappa) \sqrt{\ln(\frac{12T}{\delta})}}{\sqrt{T}}, \end{aligned}$$

where the last inequality holds since  $\sum_{t=1}^T \frac{1}{\sqrt{t}} \leq 2\sqrt{T}$ . Combining these inequalities together, we have with probability at least  $1 - \delta$ , we have

$$Q(\bar{\theta}_T) - Q(\theta_*) \leq \frac{R^2}{\gamma T} + 10\gamma + \frac{R(20 + 4C\kappa) \sqrt{\ln(12T/\delta)}}{\sqrt{T}}.$$

Choosing  $\gamma = \frac{R}{\sqrt{10T}}$ , we have

$$Q(\bar{\theta}_T) - Q(\theta_*) \leq \frac{(2\sqrt{10} + (20 + 4C\kappa) \sqrt{\ln(12T/\delta)}) R}{\sqrt{T}}.$$

□

**Lemma 3.** With probability at least  $1 - \delta$ ,

$$\sup_{\theta \in [0, 0.5], \mathbf{z} \in \mathcal{Z}} \|\hat{G}_t(\theta, \mathbf{z}) - G(\theta, \mathbf{z})\|_2 \leq (1 + C\kappa) \sqrt{\frac{\ln(4/\delta)}{t}}.$$

*Proof.* For any  $\theta$  and any  $\mathbf{z}$ , the following argument holds. By Hoeffding's inequality, we have with probability at least  $1 - \frac{\delta}{2}$ ,

$$|\hat{\pi}_t - \pi| \leq \sqrt{\frac{\ln(4/\delta)}{2t}}.$$

By the Assumption 1, we have with probability at least  $1 - \frac{\delta}{2}$ ,

$$|\hat{\eta}_t(\mathbf{x}) - \eta(\mathbf{x})| \leq C\kappa \sqrt{\frac{\ln(4/\delta)}{t}}.$$

Note that  $0 \leq \theta \leq 0.5$ , and hence we know that with probability at least  $1 - \delta$ ,

$$\text{LHS} \leq |\hat{\pi}_t - \pi| \cdot \theta + |\hat{\eta}_t(\mathbf{x}_t) - \eta(\mathbf{x}_t)| \leq (1 + C\kappa) \sqrt{\frac{\ln(4/\delta)}{t}}.$$

□

## 2.5 Proof of Theorem 3

Given Theorem 2, the proof of Theorem 3 follows similar as the analysis [1] by noting that the objective function  $Q(\theta)$  is strongly convex which is a special case of uniformly convex. For completeness, we give a proof here.

*Proof.* Define

$$\bar{\delta} = \frac{2\delta}{\log_2 n}, \quad a(n, \bar{\delta}) = \frac{2\sqrt{10} + (20 + 4C\kappa)\sqrt{\ln(12n/\bar{\delta})}}{\sqrt{n}},$$

$$\mu_0 = \frac{2a(n_0, \bar{\delta})}{R_0}, \quad \mu_k = 2^k \mu_0, \quad R_k = R_0/2^k$$

where  $k = 1, \dots, m$ . Then we have  $\mu_k R_k^2 = 2^{-k} \mu_0 R_0^2$ .

By definition of  $m$  in Algorithm 1 (FOFO), when  $n \geq 100$ ,

$$0 < \frac{1}{2} \log_2 \frac{2n}{\log_2 n} - 2 \leq m \leq \frac{1}{2} \log_2 \frac{2n}{\log_2 n} - 1 \leq \frac{1}{2} \log_2 n, \quad (12)$$

so we have

$$2^m \geq \frac{1}{4} \sqrt{\frac{2n}{\log_2 n}}. \quad (13)$$

Define  $c = \sqrt{\frac{2}{\sigma}}$ , and note that  $Q(\theta)$  is  $\sigma$ -strongly convex, and hence  $\|\theta - \theta^*\|_2 \leq c(Q(\theta) - Q(\theta^*))^{\frac{1}{2}}$ , where  $\theta^*$  is the closest point to  $\theta$  in  $[0, 0.5]$ .

Without loss of generality, we assume  $c^2 \geq \frac{R_0}{2}$ , i.e.,  $\frac{1}{c^2} \leq \frac{2}{R_0}$ . Now we prove that  $\frac{2}{R_0} \leq \mu_m$ . When  $n \geq 100$ , we have

$$\begin{aligned} \mu_m &= 2^m \mu_0 \\ &\geq \frac{1}{4} \sqrt{\frac{2n}{\log_2 n}} \frac{4}{R_0} \left( \frac{\sqrt{10}}{\sqrt{n_0}} + \frac{(10 + 2C\kappa)\sqrt{\ln(12n_0/\bar{\delta})}}{\sqrt{n_0}} \right) \\ &\geq \frac{2}{R_0} \cdot \frac{1}{2} \sqrt{\frac{2n}{\log_2 n}} \left( \frac{\sqrt{10}}{\sqrt{n_0}} + \frac{8\sqrt{\ln(6\log_2 n)}}{\sqrt{n_0}} \right) \\ &\geq \frac{2}{R_0} \sqrt{\frac{2n}{\log_2 n}} \sqrt{\frac{(8\sqrt{10})\sqrt{\ln(6\log_2 n)}}{n_0}} \\ &\geq \frac{2}{R_0} \cdot \sqrt{\frac{2n}{\log_2 n}} \sqrt{\frac{(8\sqrt{10})\sqrt{\ln(3\log_2 n)}}{\frac{n}{m}}} \\ &\geq \frac{2}{R_0} \cdot \sqrt{\frac{2n}{\log_2 n}} \sqrt{\frac{(8\sqrt{10})\sqrt{\ln(3\log_2 n)}}{\frac{n}{\frac{1}{2} \log_2 \frac{2n}{\log_2 n} - 2}}} \\ &= \frac{2}{R_0} \sqrt{(8\sqrt{10})\sqrt{\ln(3\log_2 n)}} \left( 1 - \frac{\log_2 \log_2 n + 3}{\log_2 n} \right) \\ &\geq \frac{2}{R_0}. \end{aligned}$$

where the first inequality holds because of (13), the second inequality stems from the fact that  $10 + 2C\kappa > 8$ ,  $0 < \delta < 1$ ,  $n_0 \geq 1$ , and the definition of  $\bar{\delta}$ , the third inequality holds by employing  $a + b \geq 2\sqrt{ab}$ , the fourth inequality holds because  $0 < n_0 = \lfloor n/m \rfloor \leq n/m$ , the fifth inequality holds because of the lower bound of  $m$  in (12), and the last inequality holds since when  $n \geq 100$ , the function  $(8\sqrt{10})\sqrt{\ln(3\log_2 n)} \left( 1 - \frac{\log_2 \log_2 n + 3}{\log_2 n} \right)$  is monotonically increasing with respect to  $n$ , and hence is greater than 1. So  $\frac{2}{R_0} \leq \mu_m$ . Recall that  $\frac{1}{c^2} \leq \frac{2}{R_0}$ , and thus,  $\frac{1}{c^2} \leq \mu_m$ .

Given  $\hat{\theta}_k$ , denote  $\hat{\theta}_k^*$  by the closest optimal solution to  $\hat{\theta}_k$ . We consider two cases.

**Case 1.** If  $\frac{1}{c^2} \geq \mu_0$ , then  $\mu_0 \leq \frac{1}{c^2} \leq \mu_m$ . So there exists a  $k^*$  such that  $\mu_{k^*} \leq \frac{1}{c^2} \leq \mu_{k^*+1} = 2\mu_{k^*}$ , where  $0 \leq k^* < m$ . To utilize this fact, we have the following lemma.

**Lemma 4.** Let  $k^*$  satisfy  $\mu_{k^*} \leq \frac{1}{c^2} \leq 2\mu_{k^*}$ . Then for any  $1 \leq k \leq k^*$ , there exists a Borel set  $\mathcal{A}_k \subset \Omega$  of probability at least  $1 - k\bar{\delta}$ , such that for  $\omega \in \mathcal{A}_k$ , the points  $\{\hat{\theta}_k\}_{k=1}^m$  generated by the Algorithm 1 satisfy

$$\|\hat{\theta}_{k-1} - \hat{\theta}_{k-1}^*\|_2 \leq R_{k-1} = 2^{-k+1}R_0, \quad (14)$$

$$Q(\hat{\theta}_k) - Q_* \leq \mu_k R_k^2 = 2^{-k} \mu_0 R_0^2. \quad (15)$$

Moreover, for  $k > k^*$  there is a Borel set  $\mathcal{C}_k \subset \Omega$  of probability at least  $1 - (k - k^*)\bar{\delta}$  such that on  $\mathcal{C}_k$ , we have

$$Q(\hat{\theta}_k) - Q(\hat{\theta}_{k^*}) \leq \mu_{k^*} R_{k^*}^2. \quad (16)$$

*Proof.* We prove (14) and (15) by induction. Note that (14) holds for  $k = 1$ . Assume it is true for some  $k > 1$  on  $\mathcal{A}_{k-1}$ . According to the Theorem 2, there exists a Borel set  $\mathcal{B}_k$  with  $\Pr(\mathcal{B}_k) \geq 1 - \bar{\delta}$  such that

$$Q(\hat{\theta}_k) - Q_* \leq R_{k-1} a(n_0, \bar{\delta}) = \frac{1}{2} \mu_k 2^{-k} R_0 R_{k-1} = \mu_k R_k^2,$$

which is (15). By the inductive hypothesis,  $\|\hat{\theta}_{k-1} - \hat{\theta}_{k-1}^*\|_2 \leq R_{k-1}$  on the set  $\mathcal{A}_{k-1}$ . Define  $\mathcal{A}_k = \mathcal{A}_{k-1} \cap \mathcal{B}_k$ . Note that

$$\Pr(\mathcal{A}_k) \geq \Pr(\mathcal{A}_{k-1}) + \Pr(\mathcal{B}_k) - 1 \geq 1 - k\bar{\delta},$$

and on  $\mathcal{A}_k$ , by the strong-convexity of  $Q(\theta)$  and the definition of  $k^*$ , we have

$$\|\hat{\theta}_k - \hat{\theta}_k^*\|_2^2 \leq c^2 (Q(\hat{\theta}_k) - Q_*) \leq \frac{Q(\hat{\theta}_k) - Q_*}{\mu_{k^*}} \leq \frac{\mu_k R_k^2}{\mu_{k^*}} \leq R_k^2,$$

which is (14) for  $k + 1$ .

Now we prove (16). For  $k > k^*$ , one can apply the similar strategy as in Theorem 2. Specifically, at the  $k$ -th stage with  $k > k^*$ , employing the similar proof of Theorem 2 by substituting all  $\theta_*$  to  $\hat{\theta}_{k-1}$ , the first term of RHS becomes zero and hence we get a tighter bound of  $Q(\hat{\theta}_k) - Q(\hat{\theta}_{k-1})$ , we here relax the bound to be  $R_{k-1} a(n_0, \bar{\delta})$ .

So there exists a Borel set  $\mathcal{B}_k$  with  $\Pr(\mathcal{B}_k) \geq 1 - \bar{\delta}$  such that

$$Q(\hat{\theta}_k) - Q(\hat{\theta}_{k-1}) \leq R_{k-1} a(n_0, \bar{\delta}) = 2^{k^*-k} R_{k^*-1} a(n_0, \bar{\delta}) = 2^{k^*-k} \mu_{k^*} R_{k^*}^2 = \mu_k R_k^2,$$

which implies that on  $\mathcal{C}_k = \cap_{j=k^*+1}^k \mathcal{B}_j$ , we have

$$Q(\hat{\theta}_k) - Q(\hat{\theta}_{k^*}) = \sum_{j=k^*+1}^k (Q(\hat{\theta}_j) - Q(\hat{\theta}_{j-1})) \leq \sum_{j=k^*+1}^k 2^{k^*-j} \mu_{k^*} R_{k^*}^2 \leq \mu_{k^*} R_{k^*}^2.$$

By union bound, we have  $\Pr(\mathcal{C}_k) = \Pr(\cap_{j=k^*+1}^k \mathcal{B}_j) \geq 1 - (k - k^*)\bar{\delta}$ . Here completes the proof.  $\square$

Now we proceed the proof as follows. Note that  $\mu_0 \leq \frac{1}{c^2} \leq \mu_m$ . At the end of  $k^*$ -th stage, on the Borel set  $\mathcal{A}_{k^*}$  of probability at least  $1 - k^*\bar{\delta}$ , we have

$$Q(\hat{\theta}_{k^*}) - Q_* \leq \mu_{k^*} R_{k^*}^2.$$

Then on the Borel set  $\mathcal{D}_m = \mathcal{C}_m \cap \mathcal{A}_{k^*} = (\cap_{j=k^*+1}^m \mathcal{B}_j) \cap \mathcal{A}_{k^*}$  with  $\Pr(\mathcal{D}_m) \geq 1 - m\bar{\delta}$ , we have

$$\begin{aligned} Q(\hat{\theta}_m) - Q_* &= Q(\hat{\theta}_m) - Q(\hat{\theta}_{k^*}) + (Q(\hat{\theta}_{k^*}) - Q_*) \leq 2\mu_{k^*} R_{k^*}^2 \leq 4\left(\frac{\mu_{k^*}}{c^2}\right) \mu_{k^*} R_{k^*}^2 \\ &= (4c \cdot a(n_0, \bar{\delta}))^2. \end{aligned}$$

By the definition of  $m$  and  $\bar{\delta}$ , and the fact that  $m \leq \frac{1}{2} \log_2 n$ , we have  $m\bar{\delta} \leq \delta$ . So  $\Pr(\mathcal{D}_m) \geq 1 - \delta$ .

Table 1: Offline Testing F-measure (bold numbers represent the best performance)

| Datasets             | FOFO                 | OFO                  | LR            | STAMP         | OMCSL                |
|----------------------|----------------------|----------------------|---------------|---------------|----------------------|
| webspam              | <b>.9348 ± .0003</b> | .9348 ± .0004        | .9347 ± .0005 | .9312 ± .0014 | .9282 ± .0046        |
| a9a                  | <b>.6789 ± .0015</b> | .6755 ± .0020        | .6518 ± .0026 | .6735 ± .0034 | .6704 ± .0096        |
| ijcnn1               | <b>.6412 ± .0020</b> | .5776 ± .0039        | .4441 ± .0040 | .5987 ± .0328 | .6050 ± .0225        |
| w8a                  | <b>.7159 ± .0118</b> | .6695 ± .0134        | .6621 ± .0222 | .6706 ± .0289 | .6627 ± .0370        |
| covtype (2 vs o)     | <b>.7627 ± .0005</b> | .7625 ± .0005        | .7557 ± .0004 | .7568 ± .0055 | .7557 ± .0081        |
| covtype (1 vs o)     | <b>.7090 ± .0004</b> | .7082 ± .0002        | .6770 ± .0010 | .7039 ± .0047 | .7000 ± .0093        |
| cov (3 vs o)         | <b>.7277 ± .0009</b> | .7257 ± .0005        | .6914 ± .0039 | .7213 ± .0050 | .7210 ± .0050        |
| covtype (7 vs o)     | <b>.6723 ± .0022</b> | .6521 ± .0025        | .6140 ± .0037 | .6417 ± .0197 | .6513 ± .0150        |
| covtype (6 vs o)     | <b>.4468 ± .0015</b> | .4251 ± .0014        | .1258 ± .0072 | .3971 ± .0516 | .4237 ± .0142        |
| covtype (5 vs o)     | <b>.2648 ± .0036</b> | .2488 ± .0027        | .0000 ± .0000 | .2218 ± .0246 | .2362 ± .0304        |
| covtype (4 vs o)     | <b>.5512 ± .0035</b> | .5228 ± .0083        | .4123 ± .0130 | .3682 ± .0724 | .5139 ± .0256        |
| Sensorless (1 vs o)  | <b>.7549 ± .0047</b> | .6732 ± .0022        | .4774 ± .0156 | .6243 ± .1394 | .5401 ± .2360        |
| Sensorless (2 vs o)  | <b>.4698 ± .0178</b> | .2388 ± .0083        | .1667 ± .0000 | .3284 ± .1485 | .4689 ± .0330        |
| Sensorless (3 vs o)  | .2138 ± .0047        | <b>.2254 ± .0048</b> | .1345 ± .0709 | .1819 ± .0812 | .1804 ± .0413        |
| Sensorless (4 vs o)  | <b>.5895 ± .0055</b> | .3117 ± .0102        | .1360 ± .0717 | .3778 ± .2152 | .4530 ± .0813        |
| Sensorless (5 vs o)  | <b>.3089 ± .0049</b> | .2343 ± .0047        | .1009 ± .0868 | .2264 ± .1186 | .1782 ± .1228        |
| Sensorless (6 vs o)  | <b>.3607 ± .0062</b> | .2789 ± .0078        | .0993 ± .0854 | .2772 ± .0702 | .2266 ± .1503        |
| Sensorless (7 vs o)  | .9994 ± .0002        | <b>.9996 ± .0001</b> | .9986 ± .0010 | .9988 ± .0009 | .9982 ± .0017        |
| Sensorless (8 vs o)  | <b>.4085 ± .0017</b> | .3158 ± .0047        | .0496 ± .0799 | .3185 ± .1159 | .3484 ± .0583        |
| Sensorless (9 vs o)  | <b>.2783 ± .0037</b> | .2069 ± .0039        | .1346 ± .0710 | .1749 ± .1352 | .1902 ± .1251        |
| Sensorless (10 vs o) | <b>.6025 ± .0080</b> | .4897 ± .0113        | .1659 ± .0000 | .4089 ± .2345 | .5170 ± .0566        |
| Sensorless (11 vs o) | .9997 ± .0000        | .9997 ± .0002        | .9998 ± .0002 | .9997 ± .0001 | <b>.9998 ± .0002</b> |
| protein (1 vs o)     | .5008 ± .0026        | <b>.5037 ± .0059</b> | .4643 ± .0114 | .4914 ± .0163 | .4930 ± .0116        |
| protein (2 vs o)     | <b>.6849 ± .0035</b> | .6835 ± .0040        | .6390 ± .0053 | .6787 ± .0069 | .6735 ± .0144        |
| protein (0 vs o)     | .7479 ± .0017        | <b>.7483 ± .0014</b> | .7183 ± .0023 | .7430 ± .0071 | .7423 ± .0052        |

**Case 2.** If  $\frac{1}{c^2} < \mu_0$ , then on  $\mathcal{A}_1 = \mathcal{B}_1$ ,

$$Q(\hat{\theta}_1) - Q_* \leq R_0 \cdot a(n_0, \bar{\delta}) = \frac{R_0}{a(n_0, \bar{\delta})} \cdot a(n_0, \bar{\delta})^2 = \frac{2}{\mu_0} a(n_0, \bar{\delta})^2 \leq 2(c \cdot a(n_0, \bar{\delta}))^2.$$

Hence on  $\mathcal{A}_1 \cap \mathcal{C}_m$ , by using Lemma 4 and a similar argument as in case 1, we have

$$Q(\hat{\theta}_m) - Q_* = Q(\hat{\theta}_m) - Q(\hat{\theta}_1) + Q(\hat{\theta}_1) - Q_* \leq 2R_0 \cdot a(n_0, \bar{\delta}) \leq (2c \cdot a(n_0, \bar{\delta}))^2,$$

where  $\Pr(\mathcal{A}_1 \cap \mathcal{C}_m) \geq 1 - \delta$ .

Combining the two cases, we have with probability at least  $1 - \delta$ ,

$$Q(\hat{\theta}_m) - Q_* \leq (4c \vee 2c)^2 (a(n_0, \bar{\delta}))^2 = \tilde{O}\left(\frac{\ln(\frac{1}{\delta})}{\sigma n}\right).$$

□

### 3 More Experimental Results

More experimental results are reported in Table 1 (offline testing results) and Figure 1 (online F-measure vs running time).

### References

- [1] Anatoli Juditsky and Yuri Nesterov. Deterministic and stochastic primal-dual subgradient algorithms for uniformly convex minimization. *Stoch. Syst.*, 2014.
- [2] Nagarajan Natarajan, Oluwasanmi Koyejo, Pradeep Ravikumar, and Inderjit S. Dhillon. Consistent binary classification with generalized performance metrics. In *Neural Information Processing Systems (NIPS)*, 2014.

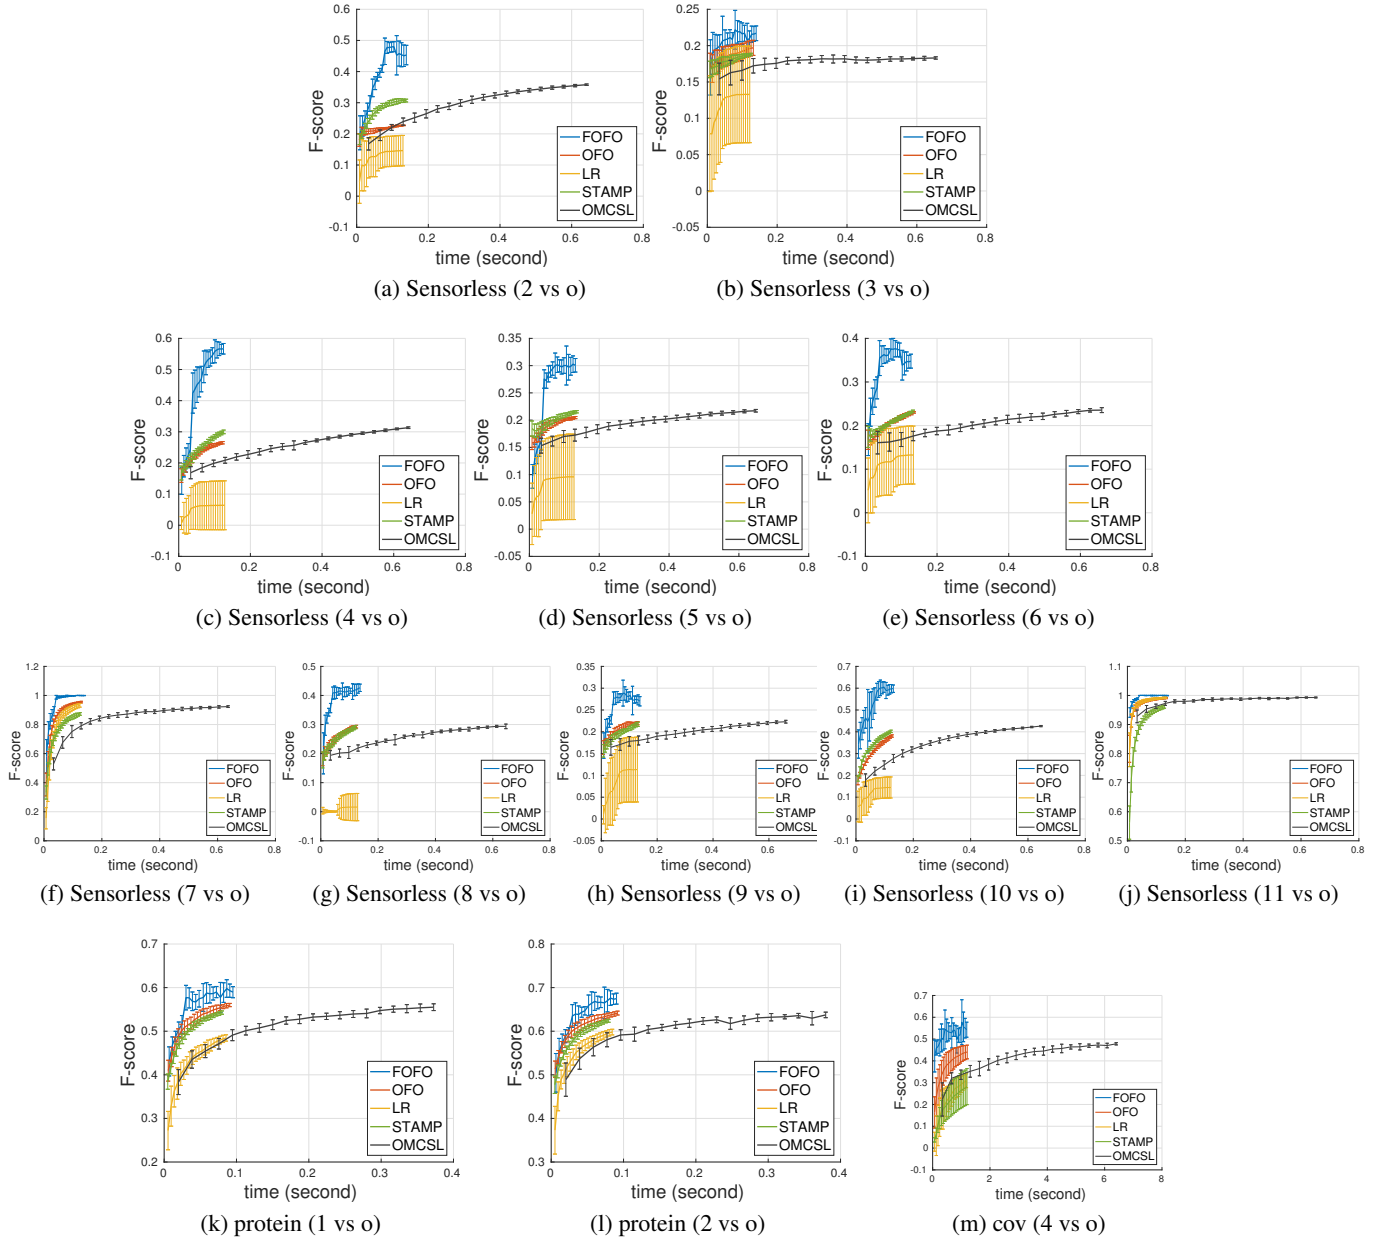

Figure 1: Online F-measure vs Running Time for more datasets

[3] Ming-Jie Zhao, Narayanan Edakunni, Adam Pocock, and Gavin Brown. Beyond fano's inequality: bounds on the optimal f-score, ber, and cost-sensitive risk and their implications. *Journal of Machine Learning Research*, 14(Apr):1033–1090, 2013.

[4] Martin Zinkevich. Online convex programming and generalized infinitesimal gradient ascent. 2003.
